# Supplementary material for: MicroRNA485-3p negatively regulates the transcriptional co-repressor CtBP1 to control the oncogenic process in osteosarcoma cells
Source: PubMed Central journal article supplement — Int J Biol Sci. 2018 Aug 6;14(11):1445–56. doi: 10.7150/ijbs.26335 (PMC6158736; doi:10.7150/ijbs.26335), 2018-08-06
Supplement: ijbsv14p1445s1.pdf [file ijbsv14p1445s1.pdf]

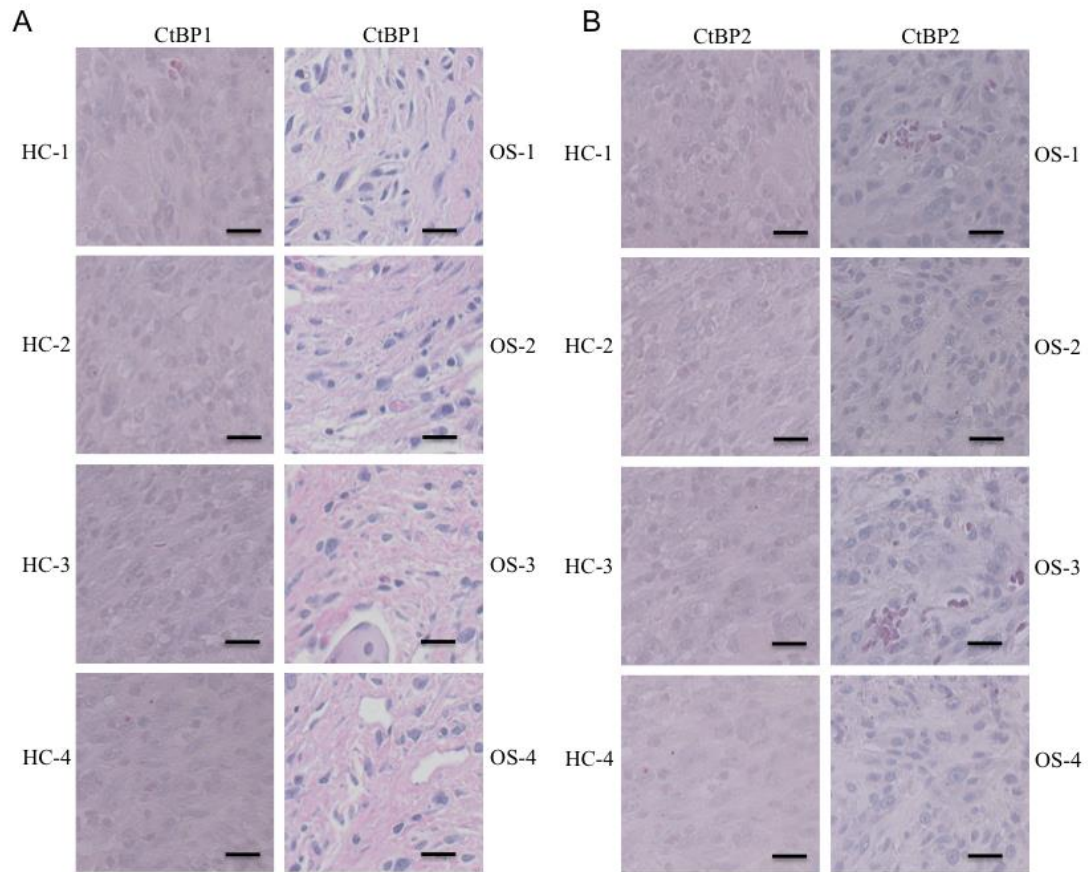

**Supplementary Figure 2. Elevated CtBP1 level in cancerous osteosarcoma tissues.**  
**(A)** Representative IHC images of CtBP1 in noncancerous (HC, n=4) and cancerous (OS, n=4) tissues. **(B)** Representative IHC images of CtBP2 in noncancerous (HC, n=4) and cancerous (OS, n=4) tissues. Bars=50 μm.

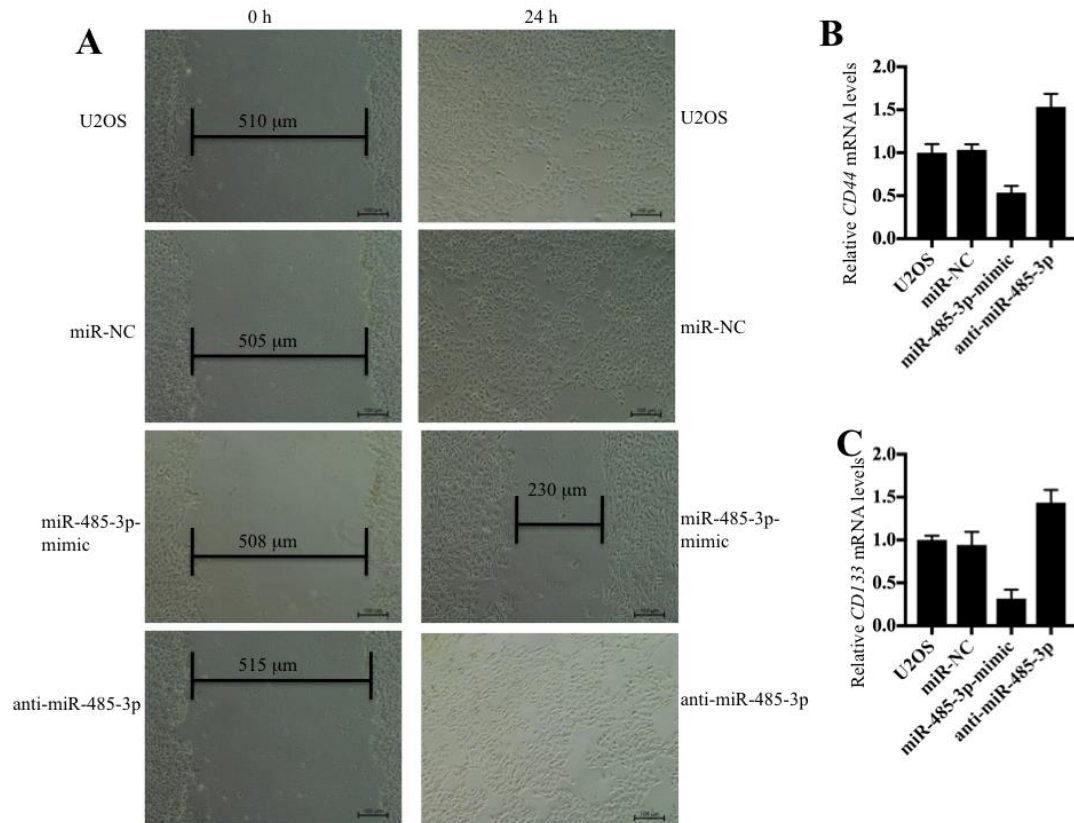

**Supplementary Figure 3. Overexpression of miR-485-3p decreased cell migration ability.**

(A) Cell used in Figure 4C were subjected to assess cell migration by scratch assay after treatment with mitomycin C for 2 h. Representative images of the cell migration gap distance of 0 and 16 h after treatment were shown. Bars=250  $\mu$ m. (B and C) The relative mRNA levels of *CD44* and *CD133*. The miR-NC, miR-485-3p and anti-miR-485-3p were transfected into U2OS cells, respectively. Then, qRT-PCR was performed to examine the mRNA levels of *CD44* (B) and *CD133* (C).

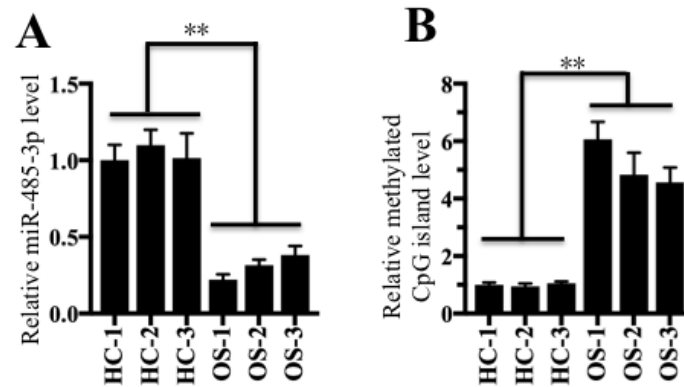

**Supplementary Figure 4. The expression of miR-485-3p in cancerous osteosarcoma tissues.**

(A) The expression of miR-485-3p in cancerous osteosarcoma tissues. The qRT-PCR was performed to measure miR-485-3p in three noncancerous tissues (HC-1, -2 and -3) and three cancerous tissues (OS-1, -2 and -3). (B) The methylation of CpG island in the promoter of miR-485-3p in cancerous osteosarcoma tissues. The qMSP was performed to determine DNA methylation of CpG island in three noncancerous tissues (HC-1, -2 and -3) and three cancerous tissues (OS-1, -2 and -3). \*\* $P < 0.001$ .

**Supplementary Table-1. The basic information of patients**

| <b>Patient</b> | <b>Age</b> | <b>Sex</b> | <b>MSTS stage</b> | <b>Source of samples</b> |
|----------------|------------|------------|-------------------|--------------------------|
| <b>HC-1</b>    | 9          | Female     | NA                | Knee                     |
| <b>HC-2</b>    | 9          | Male       | NA                | Knee                     |
| <b>HC-3</b>    | 10         | Male       | NA                | Knee                     |
| <b>HC-4</b>    | 10         | Female     | NA                | Knee                     |
| <b>HC-5</b>    | 11         | Female     | NA                | Knee                     |
| <b>HC-6</b>    | 11         | Male       | NA                | Knee                     |
| <b>HC-7</b>    | 11         | Female     | NA                | Knee                     |
| <b>HC-8</b>    | 11         | Male       | NA                | Knee                     |
| <b>HC-9</b>    | 12         | Female     | NA                | Knee                     |
| <b>HC-10</b>   | 13         | Female     | NA                | Knee                     |
| <b>HC-11</b>   | 13         | Male       | NA                | Knee                     |
| <b>HC-12</b>   | 13         | Female     | NA                | Knee                     |
| <b>HC-13</b>   | 15         | Male       | NA                | Knee                     |
| <b>HC-14</b>   | 16         | Female     | NA                | Knee                     |
| <b>HC-15</b>   | 16         | Female     | NA                | Knee                     |
| <b>HC-16</b>   | 17         | Female     | NA                | Knee t                   |
| <b>HC-17</b>   | 17         | Female     | NA                | Knee                     |
| <b>HC-18</b>   | 18         | Male       | NA                | Knee                     |
| <b>HC-19</b>   | 19         | Male       | NA                | Knee                     |
| <b>HC-20</b>   | 19         | Male       | NA                | Knee                     |
| <b>HC-21</b>   | 22         | Female     | NA                | Knee                     |
| <b>HC-22</b>   | 22         | Female     | NA                | Knee                     |
| <b>HC-23</b>   | 23         | Male       | NA                | Knee                     |
| <b>HC-24</b>   | 24         | Male       | NA                | Knee                     |
| <b>OS-1</b>    | 7          | Female     | III               | Knee                     |
| <b>OS-2</b>    | 7          | Male       | III               | Knee                     |
| <b>OS-3</b>    | 7          | Male       | III               | Knee                     |
| <b>OS-4</b>    | 8          | Female     | III               | Knee                     |
| <b>OS-5</b>    | 9          | Female     | III               | Knee                     |
| <b>OS-6</b>    | 9          | Male       | III               | Knee                     |
| <b>OS-7</b>    | 9          | Male       | III               | Knee                     |
| <b>OS-8</b>    | 9          | Male       | III               | Knee                     |
| <b>OS-9</b>    | 10         | Female     | III               | Knee                     |
| <b>OS-10</b>   | 10         | Female     | III               | Knee                     |
| <b>OS-11</b>   | 11         | Male       | III               | Knee                     |
| <b>OS-12</b>   | 12         | Female     | III               | Knee                     |
| <b>OS-13</b>   | 12         | Male       | III               | Knee                     |
| <b>OS-14</b>   | 12         | Male       | III 9 (CtBP1 low) | Knee                     |
| <b>OS-15</b>   | 14         | Female     | III               | Knee                     |
| <b>OS-16</b>   | 15         | Male       | IV                | Knee                     |
| <b>OS-17</b>   | 15         | Male       | IV                | Knee                     |
| <b>OS-18</b>   | 15         | Male       | IV                | Knee                     |
| <b>OS-19</b>   | 15         | Male       | IV (CtBP1 low)    | Knee                     |
| <b>OS-20</b>   | 16         | Male       | IV                | Knee                     |
| <b>OS-21</b>   | 16         | Female     | IV                | Knee                     |
| <b>OS-22</b>   | 17         | Female     | IV                | Knee                     |
| <b>OS-23</b>   | 17         | Male       | IV                | Knee                     |

|              |    |        |                |      |
|--------------|----|--------|----------------|------|
| <b>OS-24</b> | 17 | Female | IV (CtBP1 low) | Knee |
| <b>OS-25</b> | 17 | Female | IV             | Knee |
| <b>OS-26</b> | 18 | Female | IV             | Knee |
| <b>OS-27</b> | 19 | Female | IV (CtBP1 low) | Knee |
| <b>OS-28</b> | 19 | Female | IV             | Knee |
| <b>OS-29</b> | 21 | Male   | IV             | Knee |
| <b>OS-30</b> | 22 | Male   | IV             | Knee |

**Supplementary Table-2. Primers used for qRT-PCR analyzes**

| <b>Gene</b> | <b>Forward Primers</b>        | <b>Reverse primers</b>          |
|-------------|-------------------------------|---------------------------------|
| CtBP1       | 5'-TTCTGCGACGCGCAGTCCACGCA-3' | 5'-TCGATGTTGTCAAAACCACTGCCAA-3' |
| CtBP2       | 5'-CCTGCAGGATTTGCTGTATCA-3'   | 5'-CTTGTGCTAAGGCTTTCTCGT-3'     |
| Bax         | 5'-GGGGACGAACTGGACAGTAA-3'    | 5'-CAGTTGAAGTTGCCGTCAGA-3'      |
| Bim         | 5'-CCGCCCTTATGATGAAGTGT-3'    | 5'-AAAGCCTGGAGTCAGCAAAA-3'      |
| E-cadherin  | 5'-AGCGTGTGTGACTGTGAAGG -3'   | 5'-GCTGGCTCAAGTCAAAGTCC-3'      |
| PUMA        | 5'-TGTGACCACTGGCATTTCATT -3'  | 5'-TCCTCCCTCTTCCGAGATTT -3'     |
| p16         | 5'-ATATGCCTTCCCCCACTACC -3'   | 5'-CGTGAGTGCTCACTCCAGAA-3'      |
| p21         | 5'-ATGAAATTCACCCCTTTCC-3'     | 5'-CCCTAGGCTGTGCTCACTTC-3'      |
| PTEN        | 5'-ACCAGGACCAGAGGAAACCT -3'   | 5'-GCTAGCCTCTGGATTTGACG-3'      |
| CD44        | 5'-CACAAATGGCTGGTACGTCT -3'   | 5'-GTGTGGTTGAAATGGTGCTGG-3'     |
| CD133       | 5'-GCCCAGTACAACACTACCAA -3'   | 5'-GGTCTCCTTGATCGCTGTTGCC-3'    |
| β-Actin     | 5'-GATGAGATTGGCATGGC-3'       | 5'-CACCTTCACCGTCCAGTTT-3'       |

**Supplementary Table-3. Primers used for qMSP analyzes**

| <b>Gene</b> | <b>Forward Primers</b>          | <b>Reverse primers</b>          |
|-------------|---------------------------------|---------------------------------|
| GAPDH       | 5'-CGCTTTCTTTTCCTTTCGC-3'       | 5'-TGCCCATTTCATTTTCCTTCC-3'     |
| miR-485-3p  | 5'-TTGTGTAGAAGATGTAGGAATGTTG-3' | 5'-TCAAATCCAAAAAACACCTAATAAA-3' |
